# Supplementary material for: Assessing stratospheric contributions to subseasonal predictions of precipitation after the 2018 SSW from SNAPSI
Source: Copernicus journal article supplement (doi:10.5194/egusphere-2025-484), 2025-02-19
Supplement: Supplementary file [file egusphere-2025-484-AC2-supplement.pdf]

We would like to thank Reviewer 2 for the very helpful comments. Please find below our responses to all of the reviewer’s comments.

Reviewer #2: Reviewer Comments

Review: Assessing Stratospheric Contributions to Subseasonal Predictions of Precipitation after the 2018 SSW from SNAPSI

Ying Dai, Peter Hitchcock, Amy H. Butler, Chaim I. Garfinkel, and William J. M. Seviour

Summary

The manuscript presents an in-depth analysis of the role of stratospheric extreme events, particularly the February 2018 sudden stratospheric warming (SSW), in subseasonal to seasonal (S2S) predictability of precipitation patterns over Europe. Utilizing a newly developed database of S2S forecasts from the SNAPSI project, the authors systematically compare three types of forecast ensembles: a free ensemble, a nudged-to-observations ensemble, and a control ensemble. The study’s focus on the ‘Wet Iberia and Dry Scandinavia’ precipitation signal provides valuable insights into the extent to which stratospheric variability influences predictability.

The manuscript is well-structured, presenting a coherent progression from observational evidence to model-based analysis. The methodology is robust, employing multiple model ensembles, observational datasets, and reanalysis products to assess predictability. However, some aspects require further clarification and refinement, particularly regarding the role of tropospheric internal variability, statistical robustness, and potential implications for operational forecasting. Below, I outline specific issues that should be addressed to strengthen the manuscript. Overall, this manuscript represents a valuable contribution to the field, and with the suggested revisions, it will be well-suited for publication.

### Major comments:

**Comment 1:** The manuscript highlights the inclusion of observational datasets (IMERG and GSN) alongside reanalysis data (ERA5) to assess the precipitation signals following the 2018 SSW. While this is an important addition compared to Ayarzaguen et al. (2018) it is not clear what additional scientific value the observational analysis provides beyond serving as a verification dataset for the reanalysis. Since ERA5 is already widely used for SSW impact studies, the authors should explicitly clarify (1) what new insights are gained by including observations, (2) whether the observations provide significant deviations from the reanalysis, and (3) how these deviations, if any, impact the overall conclusions of the study. If the observations largely confirm the ERA5 findings, it would be useful to state this explicitly and discuss the implications.

#### *Reply:*

- (1) what new insights are gained by including observations

While ERA5 is already widely used for SSW impact studies, its precipitation field cannot be used as a direct proxy for observations. This is because reanalysis precipitation is a model-based product that assimilates limited observational data. For example, ERA5 does not directly assimilate any rain-gauge data (Lavers et al., 2022). As a result, ERA5 precipitation is heavily influenced by the model’s own physics and parameterizations, which can introduce systematic errors and regional biases that would not be present in true observational datasets. As a consequence, ERA5 precipitation might not accurately capture the true timing, intensity, or location of precipitation events. Since we focus on an extreme precipitation event in this study, it is essential to evaluate the ability of ERA5 precipitation to capture the magnitude, location, pattern, and daily variations of the observed precipitation for there to be confidence in the ERA5 precipitation.

In this sense, a key new insight from this study is the first identification of stratospheric signals linked to SSW in observational precipitation datasets. The close agreement between observations and reanalysis sharpens the realism and strengthens the confidence in our analyses.

- (2) whether the observations provide significant deviations from the reanalysis

As shown in Fig. 2 in the manuscript, GSN agrees closely with ERA5 (green vs. gray curves in Fig. 2 in the manuscript).

While the anomalies in IMERG appear stronger than those in ERA5 (purple vs. gray curves in Fig. 2 in the manuscript), the discrepancies are more plausibly due to limitations in IMERG itself, given that GSN shows good agreement with ERA5.

- (3) how these deviations, if any, impact the overall conclusions of the study. If the observations largely confirm the ERA5 findings, it would be useful to state this explicitly and discuss the implications.

The observations largely confirm the ERA5 findings, evidencing the reliability of ERA5 reanalysis precipitation for this case.

In the revised manuscript, we have added a discussion on the scientific value to the conclusion section. Please see lines 514-516 of the revised manuscript, where we write:

*“As the first study to identify stratospheric signals linked to SSW in observational precipitation datasets, we find a close agreement between observational and ERA5 precipitation datasets in capturing the precipitation pattern following the 2018 SSW, which sharpens the realism and strengthens the confidence in our analyses.”*

**Comment 2:** The study concludes that approximately one-quarter of the observed precipitation anomaly amplitude can be attributed to stratospheric variability, with the remaining fraction likely arising from tropospheric internal variability. Also, the peaks in rainy conditions over Iberia are explained by synoptic-scale processes. This indicates an increased importance of tropospheric variability. Do certain atmospheric configurations at the tropospheric level amplify or dampen the stratospheric signal?

**Reply:** As has been pointed out in the manuscript, the Atlantic low anomaly is a pretty good predictor of the Iberian rainfall anomaly (Fig. 7c in the manuscript). In particular, a stronger Atlantic low anomaly corresponds to a larger Iberian rainfall anomaly. In this sense, an Atlantic low (high) anomaly driven by tropospheric internal variability can amplify (dampen) the stratospheric signal in the Iberian rainfall anomaly. With that said, a detailed examination of how tropospheric configurations may amplify or suppress the stratospheric signal lies outside the scope of this study, because SNAPSI is not designed to investigate such processes.

**Comment 3:** The authors argue that the doubled likelihood of Iberian rainfall extremes in the presence of the 2018 SSW suggests that the event does have the potential to bring rainfall extremes to Iberia. How is this aligned with only a quarter of the observed precipitation anomaly amplitude being attributed to stratospheric variability in general? How does 2018 SSW differ from the other major SSW events in this regard?

**Reply:**

- How is this aligned with only a quarter of the observed precipitation anomaly amplitude being attributed to stratospheric variability in general?

The two perspectives converge on the view that other influencing factors also play a role in driving the observed Iberian precipitation anomaly. For example, according to Fig. 9 in the manuscript, even in the presence of the 2018 SSW, the likelihood of Iberian rainfall extremes remains below 9%. This relatively low likelihood suggests that the actual occurrence of Iberian rainfall extremes does not depend solely on the occurrence of SSW but depends on a combination of other influencing factors. Similarly, the fact that the 2018 SSW only accounts for a fraction of the observed precipitation anomaly amplitude also indicates the contribution from additional influencing factors.

- How does 2018 SSW differ from the other major SSW events in this regard?

To address this question, we show  $\Delta\text{PRCP}_{\text{Iberia}}$  (full value and the SSW-induced component) for individual historical SSW events from ERA5 (Fig. 1a in this reply). The 2018 SSW’s  $\Delta\text{PRCP}_{\text{Iberia}}$

ranks as the 5th strongest among all historical events (blue bars in Fig. 1a), but the SSW-induced component for the 2018 SSW does not stand out as one of the strongest compared to the other events (orange bars in Fig. 1a). This indicates a relatively small stratospheric signal in  $\Delta\text{PRCP}_{\text{Iberia}}$  following the 2018 SSW. We further calculate the ratio of the magnitude of the SSW-induced component versus the magnitude of the residuals of  $\Delta\text{PRCP}_{\text{Iberia}}$  for 46 historical SSW events from ERA5 (Fig. 1b). As can be seen, the 2018 SSW event falls within the bottom 25th percentile of all historical events, indicating that stratospheric variability plays a relatively small role in  $\Delta\text{PRCP}_{\text{Iberia}}$  following the 2018 SSW compared to the other major SSW events.

In the revised manuscript, we have added a discussion on this to the conclusion section. Please see lines 532-537 of the revised manuscript, where we write:

*“This suggests that the exceptionally strong surface anomalies following the 2018 SSW are probably significantly driven by tropospheric variability. In fact, while the 2018 SSW ranks among the strongest on record in terms of the subsequent surface anomalies, the sudden warming itself is not particularly strong (Fig. S19). The contrast between the case’s moderate intensity and its disproportionately strong surface impact also points to the substantial role of tropospheric variability in driving the observed surface anomalies following the 2018 SSW.”*

**Comment 4:** The study highlights an apparent discrepancy in the timing of forecasted vs. observed precipitation anomalies over Iberia. Specifically, the forecasts tend to predict wet conditions immediately following the SSW, whereas in reality, the rainfall peak occurred approximately 15 days later. The authors argue that the surface impact of SSW occurs sooner in S2S models than in the reanalysis, suggesting that the timing of the transition to a negative NAO that occurred at the end of February 2018 was not predictably connected to the stratospheric anomalies, at least on subseasonal timescales. At the same time, the authors mention that persistent negative NAO-like SLP anomaly is a canonical surface response to SSW. Could the authors explore potential physical mechanisms behind this discrepancy that leads to different timing?

**Reply:** It has been pointed out by a previous study that a sequence of different weather regimes in the Euro-Atlantic area follows the 2018 SSW (Fig. 2 in this reply). These include positive NAO at the onset of the 2018 SSW, Scandinavian blocking in mid to late February, and negative NAO throughout most of March. Among the three regimes, the first two regimes (positive NAO and Scandinavian blocking) are atypical in the SSW-aftermath phase and therefore are unlikely driven by stratospheric variability associated with SSW. By contrast, the negative NAO is a canonical response to SSW, which is very likely driven by stratospheric variability. Since our analysis focuses on ensemble means that extract the SSW-induced variability, it is unsurprising that only the negative NAO is present in the ensemble means.

We therefore examine individual ensemble members to see if they envelope the observed evolution. To this end, for the late free ensemble of every SNAPSI model, we show  $\Delta\text{SLP}_{\text{Atlantic}}$  in each of the 50 ensemble members (color lines in Fig. 3 in this reply). Here, the late free ensemble is shown as a supplement to Fig. 10 in the manuscript, of which the right panels show the multi-model ensemble mean of the late free ensemble. It turns out that, for most SNAPSI models, individual ensemble members envelope the observed evolution of the Atlantic SLP anomaly (black lines in Fig. 3 in this reply) throughout most of the period of interest. Hence, there is no evidence that these SNAPSI models are systematically biased in capturing the timing of shift to a negative NAO. An exception is GLOBO (Fig. 3b in this reply), for which the observed response falls outside of the envelope of individual ensemble members throughout most of the period of interest.

To sum up, the discrepancy in the timing of forecasted vs. observed anomalies arises because the ensemble means represent the SSW-induced variability, but not tropospheric internal variability. Looking at individual ensemble members, it turns out that most models’ spread encompasses the observed response, suggesting that most SNAPSI models are not systematically biased in capturing the evolution of surface anomalies after the 2018 SSW.

Based on the above results, we have added a discussion to the revised manuscript. Please see lines 494-506 of the revised manuscript, where we write:

*“We then examine the evolution of the Atlantic SLP anomaly in individual ensemble members because the Atlantic SLP anomaly is a good predictor of the Iberian precipitation anomaly. To this end, for the late*

free ensemble of every SNAPSI model, we show the daily Atlantic SLP anomaly over days [1,25] from each of the 50 ensemble members (color lines in Fig. 13). Here, the result of the late free ensemble is shown as a supplement to Fig. 10, of which the right panels show the multi-model ensemble mean of the late free ensemble. It turns out that, for most SNAPSI models, individual ensemble members envelope the observed evolution of the Atlantic SLP anomaly (black lines in Fig. 13) throughout most of the period of interest. Hence, there is no evidence that these SNAPSI models are systematically biased in capturing the timing of shift to a negative NAO. Again, an exception is GLOBO (Fig. 13b), for which the observed response falls outside of the envelope of individual ensemble members throughout most of the period of interest.”

“These results suggest that for most models (except GLOBO), several individual ensemble members predict Iberian precipitation anomalies comparable to reanalysis. The observed evolution of the Atlantic SLP anomaly is also enveloped by individual ensemble members in those models, indicating that most SNAPSI models are not systematically biased in capturing the magnitude and timing of surface anomalies following the 2018 SSW.”

**Comment 5:** The manuscript discusses inter-model differences in the magnitude of forecasted precipitation anomalies. However, a more detailed exploration of the model-specific biases would be helpful. Are certain models systematically over- or under-predicting precipitation in the presence of stratospheric anomalies? Why CNRM-CM61 model exhibits mostly different behaviour than MMM?

**Reply:**

- Are certain models systematically over- or under-predicting precipitation in the presence of stratospheric anomalies?

To address this question, we show  $\Delta\text{PRCP}_{\text{Iberia}}$  in individual ensemble members for each set of forecast ensembles (blue whiskers in Fig. 4 in this reply). As can be seen, for seven of the eight SNAPSI models analyzed in this study, several individual ensemble members predict Iberian precipitation anomalies comparable to reanalysis (blue whiskers encompass ERA5 in Fig. 4). These results suggest that most SNAPSI models are not systematically biased in capturing the magnitude of the Iberian precipitation anomaly. The only exception is GLOBO, for which none of the ensemble members capture the observed magnitude of Iberian precipitation anomaly, regardless of the initialization dates or the application of the nudging technique (blue whiskers remain below ERA5). These results suggest that GLOBO is the only model that systematically under-predicts Iberian precipitation anomaly in the presence of stratospheric anomalies.

Based on the above results, we have added a discussion to the revised manuscript. Please see lines 468-482 of the revised manuscript, where we write:

*“Till now, the majority of the analysis focuses on ensemble means, in which some specific characteristics of the 2018 SSW are not present. For example, the ensemble mean  $\Delta\text{PRCP}_{\text{Iberia}}$  is only about one-fourth as strong as the observed  $\Delta\text{PRCP}_{\text{Iberia}}$  (Table 3). The timing of the ensemble mean vs. observed shift to strong, persistent negative NAO also exhibits an apparent discrepancy, with the former occurring almost right after the onset of the SSW, while the latter occurred approximately 15 days after the onset of SSW (Fig. 10). In this section, we will examine the ensemble spread of individual SNAPSI models to see if some members can capture the magnitude and timing of the observed tropospheric anomalies after the 2018 SSW. This also allows us to find out whether certain SNAPSI models are systematically biased in representing these characteristics of the 2018 SSW.”*

*“We start with the Iberian precipitation anomaly because it is the focus of our study. For each set of forecast ensembles, we show the most extreme data value (among the 50 ensemble members) (blue whiskers in Fig. 11). As can be seen, for seven of the eight SNAPSI models analyzed in this study, some ensemble members capture the observed magnitude of the Iberian precipitation anomaly (blue whiskers encompass ERA5 in Fig. 11). The only exception is GLOBO, for which none of the ensemble members capture the observed magnitude of the Iberian precipitation anomaly, regardless of the initialization dates or the application of the nudging. These results indicate that GLOBO is the only model that systematically underestimates the magnitude of the Iberian precipitation anomaly.”*

- Why CNRM-CM61 model exhibits mostly different behaviour than MMM?

We're unsure which particular aspect the reviewer is referring to because CNRM-CM61 exhibits different behaviour than MMM in a couple of fields. So here, a couple of points are listed:

(a) Regarding the early free ensemble, CNRM-CM61 is the only model that forecasted a neutral stratosphere state, whereas all the other models forecasted a strong stratospheric cooling (Fig. 7a in the manuscript).

Ongoing investigations by another SNAPSI working group are expected to address this topic in more detail, with a manuscript to be submitted shortly. We refer the reviewer to future papers in this Special issue: Stratospheric impacts on climate variability and predictability in nudging experiments (WCD/GMD inter-journal SI).

(b) Regarding the late free ensemble, CNRM-CM61's  $\Delta\text{SLP}_{\text{Arctic}}$  and  $\Delta\text{PRCP}_{\text{Scandinavia}}$  have much larger magnitude than the other models (Fig. 8c in the manuscript).

This might arise, at least partially, from the fact that CNRM-CM61's late free ensemble forecasted the strongest stratospheric warming amongst the eight SNAPSI models (Fig. 8a in the manuscript).

**Comment 6:** Given the underestimation of precipitation anomalies in the model ensembles, is there a potential for bias correction techniques or ensemble calibration methods to enhance forecast skill? How the findings of the paper can be used in hydrological prediction?

**Reply:**

- is there a potential for bias correction techniques or ensemble calibration methods to enhance forecast skill?

To address this question, we show  $\Delta\text{PRCP}_{\text{Iberia}}$  in individual ensemble members for each set of forecast ensembles (blue whiskers in Fig. 4 in this reply). As can be seen, for seven of the eight SNAPSI models analyzed in this study, several individual ensemble members predict Iberian precipitation anomalies comparable to reanalysis (blue whiskers encompass ERA5 in Fig. 4). These results suggest that most SNAPSI models are not systematically biased and thus may not require a bias correction (see our reply to Comment 5). In addition, we are unable to fully assess precipitation biases because hindcast climatologies for the SNAPSI model versions are not available.

- How can the findings of the paper be used in hydrological prediction?

Here are a couple of examples of how our findings can be leveraged in hydrological prediction:

(a) We find that SSW can significantly increase the risk of Iberian precipitation extremes (nudged vs. control ensembles). Therefore, by identifying an SSW event, hydrological forecasters could adjust the ensemble river flow predictions toward a higher risk of floods in certain basins in southern Europe.

(b) We find that the subseasonal predictability of precipitation signals after the 2018 SSW arises from a successful forecast of the sudden warming itself. Therefore, when designing ensemble forecasts, initializing forecast ensembles with accurate stratospheric conditions (e.g., during SSW events) may provide more skillful and confident hydrological predictions.

(c) We find that the stratosphere represents an important source of S2S predictability for precipitation over Europe. Therefore, stratospheric diagnostics (e.g., SPV strength) can be used as predictors in statistical or machine learning models to improve the skill of flood/drought outlooks.

## Minor comments

**Comment 1:** L14-15 The idea of this sentence is not clear to the reader: ‘Nonetheless, the likelihood of Iberian rainfall extremes comparable to or even stronger than the one observed doubles in the nudged ensemble, compared to the control ensemble.’ Please rewrite this sentence, possibly dividing it into two.

**Reply:** In the revised manuscript, this sentence has been rewritten. Please see lines 14-15 of the revised manuscript, where we write:



*“Nonetheless, Iberian rainfall extremes of equal strength or stronger than the one observed are twice as likely in the nudged ensemble than in the control ensemble.”*

**Comment 2:** L40 The authors state: ‘There is thus a clear need to evaluate the capabilities of state-of-the-art operational S2S models to predict such an SSW’. However, while the statement is true, there are several works on this topic that have already addressed this issue which should be cited here.

**Reply:** In the revised manuscript, we have cited several works on this topic. Please see lines 40-43 of the revised manuscript, where we write:

*“There is thus a clear need to evaluate the capabilities of state-of-the-art operational S2S models to predict such an SSW and the extreme tropospheric state after it. The 2018 SSW event provides an excellent case study with which to conduct the evaluation (Karpechko et al., 2018; Rao et al., 2020; Butler et al., 2020).”*

**Comment 3:** Table 1 The manuscript currently refers to model versions in the main text but uses the corresponding participating center names in the figures. This inconsistency may cause confusion for readers. It is customary to use the participating center name as the model name. Therefore, for clarity and consistency, it is better to refer to models by their participating center names, as done in the figures.

**Reply:** There is consensus among all SNAPSI working groups to refer to model versions in the main text. In this study, model versions are also used in figures in the main text (see Figs. 7-8 in the main text).

**Comment 4:** Table 2 It would be beneficial to add information on nudging levels (90 hPa) for both nudged and control experiments.

**Reply:** In the revised manuscript, we have added information on nudging levels to Table 2. Please see the caption of Table 2 in the revised manuscript, where we write:

*“For both nudged and control ensembles, the nudging region has a lower limit of 90 hPa.”*

**Comment 5:** L113-115 The authors state that they remove the seasonal cycle to calculate ERA5 anomalies. But in L120 they state that ‘the anomalies in ERA5 are also calculated relative to the climatological state’ as for the IMERG and GSN data. Does climatological state mean the same as the seasonal cycle here? This is confusing, could you please make the description of anomalies calculation more precise?

**Reply:** I apologize for the confusion. In this study, the term ‘climatological state’ does not mean the same as the term ‘seasonal cycle’.

- The climatological state refers to the daily climatology computed as the multi-year average for each calendar day.
- The seasonal cycle is a smoothed version of the daily climatology. In this study, the seasonal cycle is defined as the mean and first three Fourier harmonics of the daily climatology.

As the reviewer has noticed, the unsmoothed daily climatology is used to calculate anomalies for both IMERG and GSN data, as well as ERA5 precipitation that is directly compared to IMERG and GSN. This is because the observational data like IMERG and GSN have missing values on certain days and at certain locations. These missing values may result in gaps in the daily climatology at certain locations. The presence of gaps in the daily climatology precludes the use of smoothing techniques like the Fourier filter.

In the revised manuscript, we have reorganized part of section 2.3 and section 2.4. In particular, both the seasonal cycle and daily climatology have been defined, and their differences have been highlighted. Please see section 2.3 and section 2.4 of the revised manuscript.

**Comment 6:** L142-143 Comparison with Ayarzagüena et al., 2018 is a repetition from Introduction L50. I think this should be avoided, however, this also highlights the importance to clearly explain the additional value of observations (see Major comments 1).

**Reply:** In the revised manuscript, we have removed the comparison and explained the value of observations. Please see lines 146-149 of the revised manuscript, where we write:

*“In this section, we use NASA satellite observations and GSN in situ station observations of precipitation to identify precipitation signals after the 2018 SSW, and then compare them to those in ERA5 precipitation. The inclusion of observational precipitation adds value by providing an independent and often more accurate reference, helping to validate and complement ERA5 precipitation that does not directly assimilate any rain-gauge data (Lavers et al., 2022).”*

**Comment 7:** Figure 1a It would be good to add a short explanation of why there is areas with no data to the caption.

**Reply:** In the revised manuscript, we have added an explanation to the caption of Fig. 1. Please see the caption of Fig. 1 in the revised manuscript, at the end of the caption we write:

*“Note that IMERG precipitation in panel a provides only partial spatial coverage at latitudes above 60°. This is because infrared-based precipitation estimates cannot be included at higher latitudes, so the coverage is limited to grid boxes for which there is no snow/ice on the surface.”*

**Comment 8:** Figures 2 and 4 The manuscript briefly discusses precipitation anomalies over North America (L158-159, L212-214), but it also states that these signals are not directly attributable to the 2018 SSW and are not the focus of the analysis. Given this, their inclusion in the main text may distract from the core findings. To improve clarity and maintain focus, I suggest moving the discussion of North American precipitation signals to the Supplementary Material.

**Reply:** In the revised manuscript, the discussion of North American precipitation signals has been moved to the Supplementary Material. Please see Figures 2 and 4 in the revised manuscript, as well as Supplementary Figures 2 and 7.

**Comment 9:** L266-270 Not all SSWs lead to negative NAO and precipitation anomalies. I suggest that the authors add a discussion on how this variability might affect the results, particularly in terms of predictability and the generalizability of the conclusions. Addressing this point would strengthen the interpretation of the findings.

**Reply:** A discussion has been added to the revised manuscript. Please see lines 275-279 of the revised manuscript, where we write:

*“It is important to note that not all SSW events lead to a persistent negative NAO or European precipitation anomalies. This event-to-event variability in the surface response to SSWs introduces uncertainty into any predictive framework based solely on the occurrence of SSWs. One way to mitigate this uncertainty is by conditioning predictions on specific characteristics of the SSW (e.g., type, magnitude, and tropospheric precursors) (Maycock and Hitchcock, 2015; Kodera et al., 2016; Runde et al., 2016; de la Cmara et al., 2017; White et al., 2019; Xu et al., 2022).”*

## References

- Ayarzaguena, B., Barriopedro, D., Perez, J. M. G., Abalos, M., de la Camara, A., Herrera, R. G., Calvo, N., and Ordonez, C.: Stratospheric connection to the abrupt end of the 2016/2017 iberian drought, *Geophysical Research Letters*, 45, 12,639–12,646, 2018.
- Butler, A. H., Lawrence, Z. D., Lee, S. H., Lillo, S. P., and Long, C. S.: Differences between the 2018 and 2019 stratospheric polar vortex split events, *Quarterly Journal of the Royal Meteorological Society*, 146, 3503–3521, <https://doi.org/https://doi.org/10.1002/qj.3858>, 2020.
- de la Cmara, A., Albers, J., Birner, T., Garcia, R. R., Hitchcock, P., Kinnison, D. E., and Smith, A. K.: Sensitivity of sudden stratospheric warmings to previous stratospheric conditions, *Journal of the Atmospheric Sciences*, 74, 2857–2877, 2017.
- Karpechko, A. Y., Perez, A. C., Balmaseda, M., Tyrrell, N., and Vitart, F.: Predicting sudden stratospheric

- warming 2018 and its climate impacts with a multi-model ensemble, *Geophysical Research Letters*, p. 2018GL081091, 2018.
- Kodera, K., Mukougawa, H., Maury, P., Ueda, M., and Claud, C.: Absorbing and reflecting sudden stratospheric warming events and their relationship with tropospheric circulation, *Journal of Geophysical Research: Atmospheres*, 121, 80–94, 2016.
- Lavers, D. A., Simmons, A., Vamborg, F., and Rodwell, M. J.: An evaluation of ERA5 precipitation for climate monitoring, *Quarterly Journal of the Royal Meteorological Society*, 148, 3152–3165, <https://doi.org/https://doi.org/10.1002/qj.4351>, 2022.
- Maycock, A. C. and Hitchcock, P.: Do split and displacement sudden stratospheric warmings have different annular mode signatures?, *Geophysical Research Letters*, 42, 10 943–10 951, 2015.
- Rao, J., Garfinkel, C. I., and White, I. P.: Predicting the Downward and Surface Influence of the February 2018 and January 2019 Sudden Stratospheric Warming Events in Subseasonal to Seasonal (S2S) Models, *Journal of Geophysical Research: Atmospheres*, 125, e2019JD031 919, <https://doi.org/https://doi.org/10.1029/2019JD031919>, e2019JD031919 2019JD031919, 2020.
- Runde, T., Dameris, M., Garny, H., and Kinnison, D. E.: Classification of stratospheric extreme events according to their downward propagation to the troposphere, *Geophysical Research Letters*, 43, 6665–6672, 2016.
- White, I., Garfinkel, C. I., Gerber, E. P., Jucker, M., Aquila, V., and Oman, L. D.: The downward influence of sudden stratospheric warmings: Association with tropospheric precursors, *Journal of Climate*, 32, 85–108, 2019.
- Xu, Q., Chen, W., and Song, L.: Two Leading Modes in the Evolution of Major Sudden Stratospheric Warmings and Their Distinctive Surface Influence, *Geophysical Research Letters*, 49, e2021GL095 431, <https://doi.org/https://doi.org/10.1029/2021GL095431>, e2021GL095431 2021GL095431, 2022.



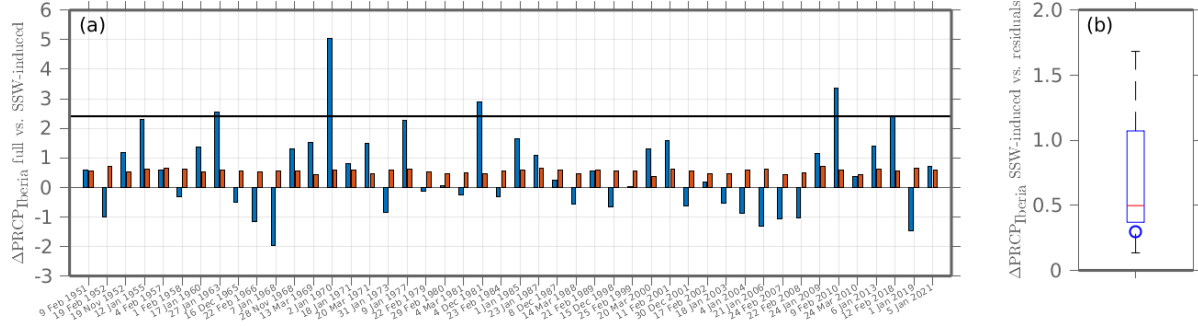

Figure 1: (a)  $\Delta\text{PRCP}_{\text{Iberia}}$  for individual historical SSW events from ERA5 (bars). For each SSW event, the blue and orange bars indicate the full value and the SSW-induced component of  $\Delta\text{PRCP}_{\text{Iberia}}$ , respectively. The black horizontal line indicates the full value of  $\Delta\text{PRCP}_{\text{Iberia}}$  for the 2018 SSW event. (b) The ratio of the magnitude of the SSW-induced component versus the magnitude of the residuals of  $\Delta\text{PRCP}_{\text{Iberia}}$  for historical SSW events from ERA5. On the box, the red line is the median, the edges of the box are the 25th and 75th percentiles, and the whiskers extend to the most extreme data value that is not an outlier. The blue circle indicates the value of the ratio for the 2018 SSW event. Here, the SSW-induced component and the residuals are obtained using the historical regression from ERA5 (see equations 4-5 in the manuscript).

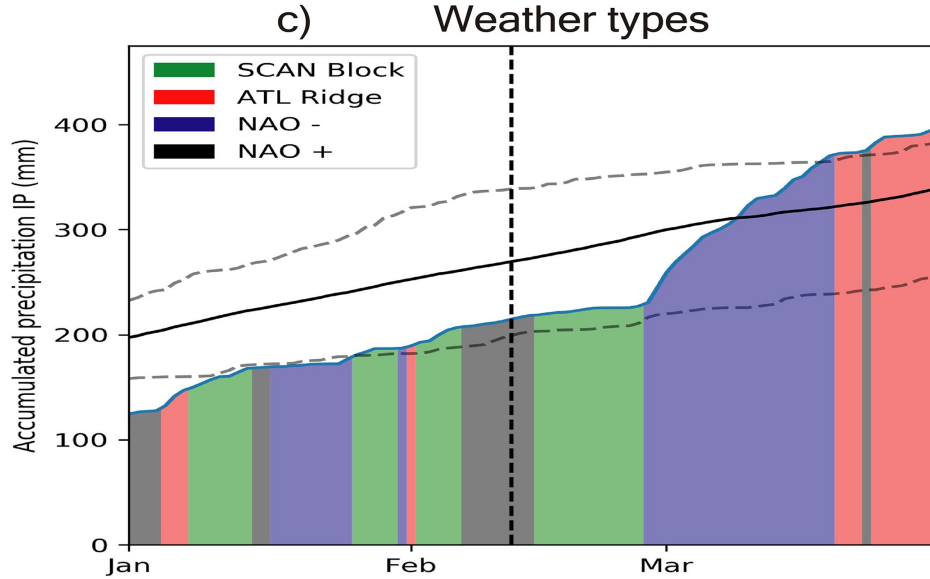

Figure 2: Daily evolution of weather regimes (color bars). The daily sequence of WRs over the Euro-Atlantic area from 1 January to 31 March 2018. Figure 1c from Ayarzagüena et al. (2018).

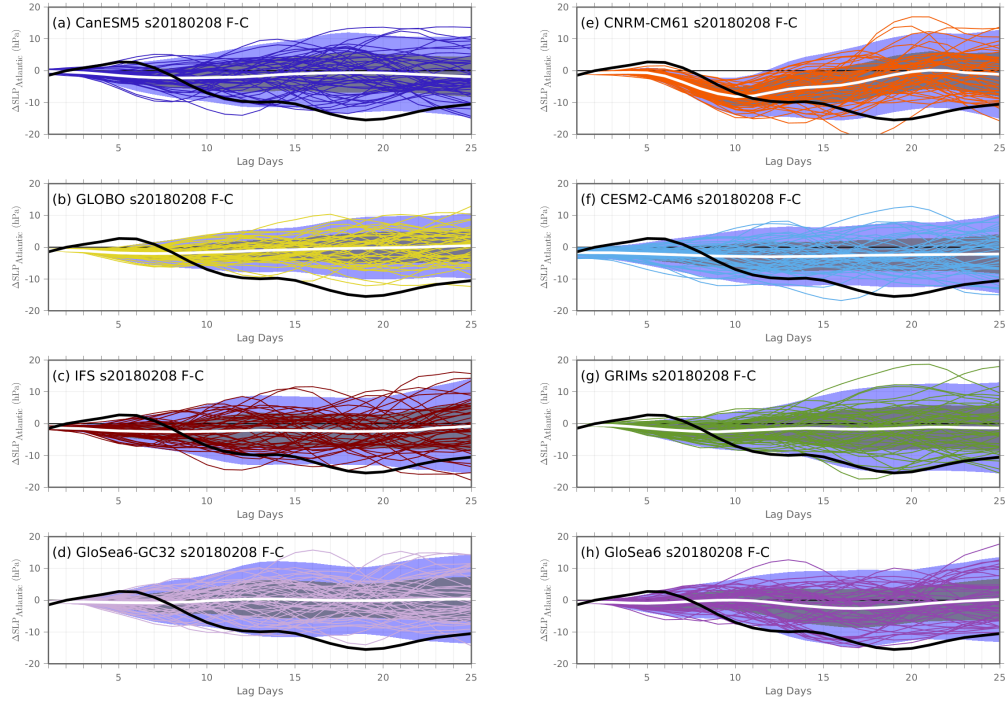

Figure 3: Time series of  $\Delta\text{SLP}_{\text{Atlantic}}$  over days [1,25] after the 2018 SSW from ERA5 (thick black curve) and from the late free ensemble (thin color curves and thick white curve). For the late free ensemble, the thin color curves indicate 50 ensemble members for each model, and then the thick white curve indicates the ensemble mean of 50 members. Grey and blue shading correspond to 1 and 2 standard deviations around the multi-member average. Here, a 5-day moving average is applied to  $\Delta\text{SLP}_{\text{Atlantic}}$  to reduce high-frequency variations.

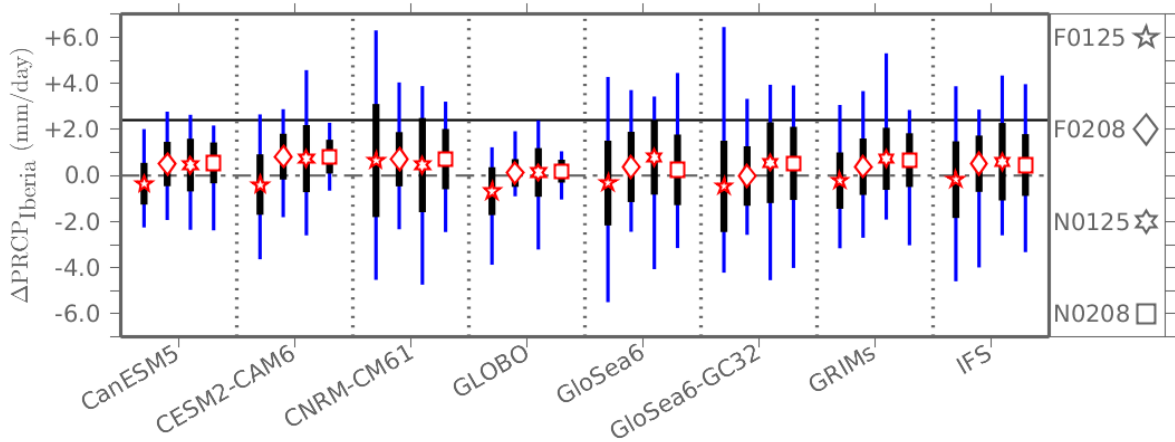

Figure 4:  $\Delta\text{PRCP}_{\text{Iberia}}$  by individual SNAPSI models. For each ensemble, the color marker is the multi-member average, the black whiskers correspond to 1 standard deviation around the multi-member average, and the blue whiskers extend to the most extreme data value. F0125: early free ensemble; F0208: late free ensemble; N0125: early nudged ensemble; N0208: late nudged ensemble. The solid black horizontal line indicates  $\Delta\text{PRCP}_{\text{Iberia}}$  from ERA5.
